# Supplementary material for: Perceptions and Impact of the 2017 Canadian Guideline for Opioid Therapy and Chronic Noncancer Pain: A Cross-Sectional Study of Canadian Physicians
Source: PubMed Central journal article supplement (PMC7048936; doi:10.1155/2020/8380171), 2020-02-17
Supplement: 8380171.f1.pdf [file 8380171.f1.pdf]

## Appendix 1: Opioid Guideline Survey

1. Do you currently prescribe opioids for chronic noncancer pain? By opioids, we mean both weak opioids (codeine, tramadol) and stronger opioids (morphine, fentanyl, etc.)

- Yes  
 No (Termination message)

2. Select the specialty/sub-specialty that is most closely related to the main area of your current practice/residency.

- |                                                                    |                                                                        |
|--------------------------------------------------------------------|------------------------------------------------------------------------|
| <input type="checkbox"/> Adolescent Medicine                       | <input type="checkbox"/> Gastroenterology - Adult                      |
| <input type="checkbox"/> Anatomical Pathology                      | <input type="checkbox"/> Gastroenterology - Pediatric                  |
| <input type="checkbox"/> Anesthesiology                            | <input type="checkbox"/> General Internal Medicine                     |
| <input type="checkbox"/> Cardiac Surgery                           | <input type="checkbox"/> General Pathology                             |
| <input type="checkbox"/> Cardiology - Adult                        | <input type="checkbox"/> General Surgery                               |
| <input type="checkbox"/> Cardiology - Pediatric                    | <input type="checkbox"/> General Surgical Oncology                     |
| <input type="checkbox"/> Child and Adolescent Psychiatry           | <input type="checkbox"/> Geriatric Medicine                            |
| <input type="checkbox"/> Clinical Immunology & Allergy - Adult     | <input type="checkbox"/> Geriatric Psychiatry                          |
| <input type="checkbox"/> Clinical Immunology & Allergy – Pediatric | <input type="checkbox"/> Gyn. Reproductive Endocrinology & Infertility |
| <input type="checkbox"/> Clinical Pharmacology & Toxicology        | <input type="checkbox"/> Gynecologic Oncology                          |
| <input type="checkbox"/> Colorectal Surgery                        | <input type="checkbox"/> Hematological Pathology                       |
| <input type="checkbox"/> Critical Care Medicine - Pediatric        | <input type="checkbox"/> Hematology                                    |
| <input type="checkbox"/> Critical Care Medicine – Adult            | <input type="checkbox"/> Infectious Diseases – Adult                   |
| <input type="checkbox"/> Dermatology                               | <input type="checkbox"/> Infectious Diseases – Pediatric               |
| <input type="checkbox"/> Developmental Pediatrics                  | <input type="checkbox"/> Internal Medicine                             |
| <input type="checkbox"/> Diagnostic Radiology                      | <input type="checkbox"/> Maternal Fetal Medicine                       |
| <input type="checkbox"/> Emergency Medicine                        | <input type="checkbox"/> Medical Biochemistry                          |
| <input type="checkbox"/> Endocrinology & Metabolism – Adult        | <input type="checkbox"/> Medical Genetics                              |
| <input type="checkbox"/> Endocrinology & Metabolism – Pediatric    | <input type="checkbox"/> Medical Microbiology                          |
| <input type="checkbox"/> Family Medicine / General Practice        | <input type="checkbox"/> Medical Oncology                              |
| <input type="checkbox"/> Forensic Pathology                        | <input type="checkbox"/> Neonatal Perinatal Medicine                   |
| <input type="checkbox"/> Forensic Psychiatry                       | <input type="checkbox"/> Nephrology – Adult                            |
|                                                                    | <input type="checkbox"/> Nephrology – Pediatric                        |
|                                                                    | <input type="checkbox"/> Neurology - Adult                             |
|                                                                    | <input type="checkbox"/> Neurology - Pediatric                         |
|                                                                    | <input type="checkbox"/> Neuropathology                                |
|                                                                    | <input type="checkbox"/> Neuroradiology                                |
|                                                                    | <input type="checkbox"/> Neurosurgery                                  |

- Nuclear Medicine
  - Obstetrics & Gynecology
  - Occupational Medicine
  - Ophthalmology
  - Orthopedic Surgery
  - Otolaryngology - Head and Neck Surgery
  - Pain Medicine
  - Palliative Medicine
  - Pediatric Emergency Medicine
  - Pediatric Hematology/Oncology
  - Pediatric Radiology
  - Pediatric Surgery
  - Pediatrics - General
  - Physical Medicine & Rehabilitation
  - Plastic Surgery
  - Psychiatry
  - Public Health and Preventive Medicine
  - Radiation Oncology
  - Respiriology – Adult
  - Respiriology – Pediatric
  - Rheumatology – Adult
  - Rheumatology – Pediatric
  - Thoracic Surgery
  - Urology
  - Vascular Surgery
  - Other area of focus, e.g., Addiction Medicine. Please specify.
-

2a. Please specify your area of focus.

3. In what province / territory do you primarily work?

- Alberta
- British Columbia
- Manitoba
- New Brunswick
- Newfoundland and Labrador
- Northwest Territories
- Nova Scotia
- Nunavut
- Ontario
- Prince Edward Island
- Quebec
- Saskatchewan
- Yukon

4. What is your age group?

- < 25
- 25 - 34
- 35 - 44
- 45 - 54
- 55 - 64
- 65 +
- I prefer not to answer

5. With what gender do you identify?

- Woman
- Man
- I do not identify within the binary system. I identify as (please specify if you wish):
- I prefer not to specify

6. With respect to your main patient care setting, what best describes the population primarily served by you.

- Urban/suburban
- Small town
- Rural
- Geographically isolated/remote
- Cannot identify a primary geographic population

7. What proportion (%) of your patient population is currently seeking care for chronic noncancer pain?

- |                          |        |                          |          |
|--------------------------|--------|--------------------------|----------|
| <input type="checkbox"/> | <6%    | <input type="checkbox"/> | 21-50%   |
| <input type="checkbox"/> | 6-10%  | <input type="checkbox"/> | 51 – 75% |
| <input type="checkbox"/> | 11-20% | <input type="checkbox"/> | >75%     |

8. To what proportion (%) of your chronic noncancer pain patients do you prescribe opioids?

- |                          |        |                          |          |
|--------------------------|--------|--------------------------|----------|
| <input type="checkbox"/> | <6%    | <input type="checkbox"/> | 21-50%   |
| <input type="checkbox"/> | 6-10%  | <input type="checkbox"/> | 51 – 75% |
| <input type="checkbox"/> | 11-20% | <input type="checkbox"/> | >75%     |

9. Before you started this survey, were you aware of the 2017 Canadian Guideline for Opioids and Chronic Noncancer Pain (the “2017 Guideline”)?

- Yes     No (survey will go to Comments option, and then close)

10. Have you read the 2017 Guideline?

- Yes, thoroughly
- Yes, parts of it
- No, but I anticipate that I will (survey will go to Comments option, then close)
- No, and I don’t anticipate that I will (survey will go to Comments option, then close)

11. Did you read the print version or the online MAGICapp version of the guideline?

- Print version only (goes to 11.a.i)
- Online MAGICapp version only (goes to 11.b.i)
- Both (goes to 11.a.i [11.a.ii.], then 11.b.i. [11.b.ii.], then 11.c.i)

11.a.i. How would you rate the format of the print version of the 2017 Guideline?

- Excellent
- Good
- Poor (goes to 11.a.ii)

- Very poor ([goes to 11 a.ii](#))
- Unsure / Don't remember

11.a.ii. Why do you feel the format was poor? (select all that apply)

- Impractical for use in clinical practice
- No patient decision-aids for recommendations
- Other (please provide details in the text box)\_\_\_\_\_

11.b.i. How would you rate the format of the online MAGICapp version of the 2017 Guideline?

- Excellent
- Good
- Poor ([goes to 11.b.ii](#))
- Very poor ([goes to 11.b.ii](#))
- Unsure / Don't remember

11.b.ii Why do you feel the format was poor? (select all that apply)

- Impractical for use in clinical practice
- The multi-layered format is overly complex
- Other (please provide details in the text box)\_\_\_\_\_

11.c.i. Which version do you prefer? ([only for those that answered "Both" for Question 11](#))

- The print version
- The online MAGICapp version
- No preference between the 2 versions

12. Rate how understandable (or clear) the 2017 Guideline is.

- Excellent
- Good
- Poor
- Very poor
- Unsure

Please explain your response: \_\_\_\_\_

13. In general, did you find the 2017 Guideline recommendations to be feasible to implement?

- Very feasible
- Somewhat feasible
- Not feasible ([goes to 13.a.i](#))
- Unsure

13.a.i. Why did you feel the recommendations were not generally feasible?

- Recommendations were too **restrictive** regarding use of opioids for chronic noncancer pain
- Recommendations were too **permissive** regarding use of opioids for chronic noncancer pain
- Recommendations were impractical
- Recommendations were unclear
- Other (please provide details in the text box) \_\_\_\_\_

Please explain your response: \_\_\_\_\_

14. Are there any areas where your current practice differs from what is recommended in the Guideline?

- Yes ([answer next question](#))
- No ([go to Question 16](#))

15. Have you made any changes in your treatment of patients with chronic noncancer pain because of the 2017 Guideline recommendations

- Yes – Please explain \_\_\_\_\_
- No, but I plan to
- No, and I don't plan to

16. To what extent do you agree with the following statement?  
*The 2017 Guideline has important advantages over other related guidelines.*

- Strongly agree
- Agree
- Uncertain [go straight to Q20]
- Disagree
- Strongly disagree
- Not applicable – there are no other guidelines in my jurisdiction [[Skip to question 20](#)]

17. Which other opioid and chronic pain guideline(s) have you consulted?

---

18. What advantages does the 2017 Guideline have over the others? (check all that apply)  
([only for Strongly Agree or Agree replies in question 16](#))

- national in scope
- broadly endorsed
- more specific guidance in certain areas
- better evidence review process
- other. Please specify \_\_\_\_\_

19. What advantages do other guidelines have over the 2017 Guideline? ([only for Disagree or Strongly Disagree replies in question 16](#)) \_\_\_\_\_

20. To what extent do you agree with the following statement?  
*The 2017 Guideline is evidence-based.*

- Strongly agree    Agree    Uncertain    Disagree    Strongly disagree

21. Is it your understanding that the 2017 Guideline mandates that you taper all patients currently prescribed high-dose opioids for chronic noncancer pain to below 90mg morphine equivalent dose (MED) per day?

- Yes    Uncertain    No

22. Would you benefit from support to manage opioid tapering efforts for your patients currently prescribed high dose opioid therapy for chronic noncancer pain ( $\geq 90$ mg MED per day):

- Yes – What support would be helpful? \_\_\_\_\_
- Uncertain
- No
- Not applicable - none of my patients are prescribed  $\geq 90$ mg MED per day

23. What factors make it challenging for you as a physician to follow the 2017 Guideline? (Check all that apply)

- Inadequate time to deal with complex cases
- Patient reluctance to cooperate in the approaches recommended
- Need for **better** training in chronic pain management
- Need for **more** training in chronic pain management
- Lack of health insurance coverage for patients to non-pharmacologic treatment alternatives for chronic noncancer pain (e.g., physical therapy)
- Lack of existing services in community that offer non-pharmacologic treatment alternatives for chronic noncancer pain
- Lack of health insurance coverage for addiction treatment and management (e.g. methadone, Suboxone®)
- Lack of existing services in community for addiction treatment and management
- Need for better continuing education in in addiction
- Lack of access to specialists who can advise me
- Unrealistic to expect tapering of some patients currently prescribed high-dose opioids to or below 90mg MED per day
- The 2017 Guideline itself is unclear
- Other \_\_\_\_\_
- There are no challenges

24. What could help you implement the 2017 Guideline recommendations? (Check all that apply)

- Access to Continuing Medical Education on opioid prescribing
- Access to Continuing Medical Education on opioid de-prescribing
- Access to Continuing Medical Education on non-opiate medical pain management approaches
- Access to guideline implementation tools and supports, such as self-assessments, checklists, and algorithms



- Access to training on evidence based approaches to supporting behaviour change
- Real-time access to prescription monitoring database
- Clinical decision support system integrated within my EMR
- Mentorship programs in chronic noncancer pain and addiction that link me with more experienced colleagues
- More specialized chronic pain treatment services in my area
- More chronic pain treatment options, covered by health insurance
- More addiction treatment services in my area
- Billing incentives to increase time with complex chronic noncancer pain patients
- Other \_\_\_\_\_
- I do not require any additional tools or assistance

25. If you could participate in just 3 CME/CPD programs on opioid prescribing in the coming year, what topic areas would you choose? Assume the format of the session is the one you prefer. (Select up to 3 options)

- Non-opioid options to pain management, pharmacologic and non-pharmacologic
- Screening, initiating and monitoring patients on opioid therapy.
- Managing the demanding, resistant or non-adherent patient on chronic opioids
- Safely tapering opioids
- Initiating opioid substitution therapy in my practice (methadone, buprenorphine / naloxone or Suboxone®)
- Preventing and managing opioid overdoses
- Community based programs to reduce the impact of opioid addictions and death
- Other: \_\_\_\_\_

26. What format of Continuing Medical Education would you find most helpful? Choose one

- Online learning: live interactive webinars
- Online learning: courses or YouTube style archived video
- Small group learning
- Mentoring with an expert colleague
- Practice audit: support in gathering and analyzing my own practice data
- Lectures
- Other – please specify \_\_\_\_\_

27. Since the launch of the 2017 Guideline, have you made any of the following changes?  
(check all that apply)

- Reduced the number of new starts of opioid medications compared to before  
([finish, to last opportunity for comment](#))
- Prescribed opioids to more patients with chronic noncancer pain ([finish, to last opportunity for comment](#))
- Decided not to prescribe opioids for patients with chronic noncancer pain who also have an active substance use disorder ([go to next question](#))
- Decided not to prescribe opioids for patients with chronic noncancer pain who also have an active psychiatric disorder, aside from substance use disorder ([go to next question](#))
- Decided not to prescribe opioids for specific patients with chronic noncancer pain based on criteria other than having an active substance use disorder or an active psychiatric disorder ([go to next question](#))
- Decided not to prescribe opioids for any patients with chronic noncancer pain ([go to next question](#))
- Reduced the dosage of opioids I prescribe for chronic noncancer pain (new starts) compared to before ([finish, to last opportunity for comment](#))
- Tapered the dose of opioids I prescribe to some existing patients ([finish, to last opportunity for comment](#))
- Reduced the number of pills dispensed at one time in opioid prescriptions that I write ([finish, to last opportunity for comment](#))
- Other changes – please specify \_\_\_\_\_  
([finish, to last opportunity for comment](#))
- No changes ([finish, to last opportunity for comment](#))

28. Please explain why you have chosen not to prescribe opioids for chronic noncancer pain to certain populations, or at all?

---

**Thank you for taking the time to share your views with us. If you have any questions about this survey, please send an email to [yourvoice@cma.ca](mailto:yourvoice@cma.ca).**
